# Supplementary material for: Spatial dynamics of mammalian brain development and neuroinflammation by multimodal tri-omics mapping
Source: Research Square preprint supplement (doi:10.21203/rs.3.rs-4814866/v1), 2024-08-11
Supplement: Supplementary file 1 [file 54fc440bf4a04ad97752310b.xlsx]

## Sheet: Sheet1
R1_A3	R1_A2	R2_A4	R2_A2	R3_A4	R3_A2	R4_A4	R4_A3	R4_A2	R5_A2	R5_A1	R6_A4	R6_A3	R6_A2
Cyp7b1	Kcnb2	Xkr4	Sulf1	Eya1	Cspp1	Map2	Rgs20	Slco5a1	Pcmtd1	Nsmf	Sgk3	Hs6st1	St18
Dab1	Nrp2	Rims1	Inpp1	Sf3b1	Cnnm3	Dlgap4	Aff3	Stau2	Gls	Armc1	Plekhb2	Hecw2	Prex2
Magi2	Nav1	Cacna1e	Adam23	Satb2	Map4k4	Nnat	Hjurp	Gm28175	Igfbp5	Pik3r3	Npas2	Pnkd	A830018L16Rik
Sez6l	Sema6d	Rxrg	Nyap2	Ncl	Gm29260	Kcnmb2	Astn1	Pantr1	Cdk5r2	Ctps	1700019D03Rik	Sphkap	Paqr8
Ano2	Slc24a3	Rgs7	Lypd1	Ptma	Gpr45	Trpc4	Cep170	Pou3f3	Scg2	Tnrc6a	Trak2	Nos1ap	Dst
Ano1	Ralyl	Celf2	Ncstn	Clasp1	Bmpr2	Ilf2	Tgfb2	Nck2	Serpine2	Hpf1	Speg	A330023F24Rik	2010300C02Rik
Gm10649	St6galnac5	Cacnb4	Igsf9	Gli2	Pard3b	Adamtsl1	Camsap1	Myo1b	Ube2f	Brd7	Eif4e2	Abca2	Tbc1d8
Cntnap4	Slc44a5	Cwc22	Esrrg	Pik3c2b	Klf7	Macf1	Cntrl	Epha4	Atp2b4	Zw10	Ngef	Olfm1	Tmeff2
Zic1	Sgip1	Ryr3	Rbms1	Kdm5b	Creb1	Glmn	Lhx2	Dner	Kcnt2	Ireb2	Cdh20	Abl1	Plcl1
Zic4	Eif4g3	Schip1	Myo3b	Dennd1b	Pikfyve	Hnrnpa2b1	Cers6	Agap1	Brinp3	Cgnl1	R3hdm1	Plcb1	Unc80
Cpne4	Camta1	Ank2	Zfp385b	Cenpf	Erbb4	Reep1	Ctnnd1	Bcl2	Glul	Cdv3	Fam163a	Pcsk2	Tns1
Gria1	Adgrl3	Ppp3ca	Zfp804a	Ehmt1	Slc16a14	Grip2	Trp53i11	Epb41l5	Stx6	A830082N09Rik	Ildr2	Dtd1	Arpc2
Pitpnm3	Epha5	Nexn	Pak6	Notch1	Pam	Srgap3	Tshz2	Srgap2	Tnr	Mcm9	Rgs4	Mme	Tmbim1
Prkca	Elfn1	Negr1	Nop56	Lrsam1	Nckap5	Numbl	Cdh4	Kif21b	Dnm3	Nr2c1	Angel2	Snx7	Tuba4a
Kcnma1	Actb	Dpp6	Macrod2	Acvr1	Mgat5	Plekhg2	Zc2hc1a	Dhx9	Vamp4	Rars	Kcnh1	Lef1	Dnajb2
Slc1a3	Tmem178b	Kctd8	Vstm2l	Dlx1as	Mapkapk2	A730056A06Rik	Stmn2	Pbx1	Atp1b1	St3gal1	Gpr158	Penk	Ptprn
Matn2	Cntnap2	Rasgef1b	Ptprt	Plekha3	Nucks1	Myo16	Frem2	Vangl2	Mpzl1	Zfp251	Grin1	Dnajc6	Acsl3
Kalrn	Snhg14	Fry	Slc12a5	Sppl2a	Mdm4	March1	Fstl5	Zbtb18	Rgs5	Mief1	Grb14	Zfyve28	Utp14b
Myo5b	Slco3a1	Dgki	Egfem1	Rnf24	Camsap2	Ncam1	Nes	Kif26b	Atp1a2	Eif4b	Rapgef4	Adamts3	Itm2c
Slit1	Tenm3	Lrrtm4	Gm20754	Cbfa2t2	Gm4258	2900079G21Rik	Col11a1	Plxna2	Capn2	Apcdd1	Syt13	Asphd2	Ramp1
Arhgap6	Nr3c2	Add2	6530403H02Rik	Src	Cdc73	Sobp	Nkain3	Psmd5	Eprs		Prr5l	Rph3a	Phlpp1
	Cacna1a	Grm7	Col25a1	Pmepa1	Glrx2	Cd24a	Faxc	Rnd3	Frmd4a		Rasgrp1	Dnaaf5	Dbi
	Cdh13	Plxnd1	Clvs1	Sox2ot	Ivns1abp	Trhde	Epha7	Ttc21b	Sec16a		Rpap1	Tecpr1	Dpp10
	Cadm1	Grin2b	Necab1	Spata5	1700025G04Rik	Grip1	Plppr1	Fnbp4	Ncs1		Sirpa	D630045J12Rik	Tmem163
	Megf11	Grik5	Coro2a	Chtop	Xpr1	Kcnip1	Zfp618	Tspan18	Zeb2		Cds2	Pde1c	Tmcc2
	Clstn2	Ptpn5	Epb41l4b	Setdb1	Fam20b	Tenm2	Serinc2	Mpped2	Kcnj3		Gpcpd1	Rmnd5a	Cntn2
	Rbms3	Gabrb3	Astn2	Kcnd3	Ralgps2	Tnrc6c	Draxin	Meis2	Kcnh7		Btbd3	Parp11	Nfasc
	Ahi1	Ntrk3	Brinp1	Ptbp2	Brinp2	Akap6	Agrn	Trp53bp1	Wipf1		Phactr3	Aebp2	Adora1
	Pcdh15	Grm5	Epha10	Fnbp1l	Nme7	Adarb2	Rgs12	Frmd5	Ptprj		Eef1a2	Rps11	Timm17a
	Syn3	Hs3st4	Zfp804b	Pde5a	Efcab2	Tubb2b	Mapk10	Gm14204	Lrp4		Car2	Gabrg3	Shisa4
	Sgcd	Fam155a	Ppm1g	Unc13b	Acbd3	Dapk1	Auts2	Dok5	Slc1a2		Pex5l	Tjp1	Csrp1
	Shisa6	Galntl6	Rimbp2	Shb	H3f3a	Fam124a	Pds5b	Zfhx4	Abtb2		Foxo1	Sytl2	Rabgap1l
	Chd3	Unc13a	Caln1	Smc2	Enah	Ctnnd2	Ccser1	Pag1	Disp2		Tsc22d2	Stim1	Prdx6
	Cacna1g	Sin3b	Srrm3	Ptbp3	Aida	Sybu	Cacna1c	Maml3	Trpm7		Etv3	Ddx49	Pcp4l1
	Hap1	Fat3	Tmem130	Cdk5rap2	Taf1a	Sept3	Sox5	Dclk1	Kcnip3		Arhgef2	Cers1	Adamts4
	Mapt	Arpp21	Mtus2	Cachd1	Sephs1	Efcab6	Slc17a6	Ssr3	Acss1		Prpf3	Cyld	Pea15a
	Klhl29	Camk2b	Foxp2	Lrp8	Mllt10	Gap43	Gm9801	Veph1	Nol4l		Sv2a	Znrf1	Igsf8
	Lrfn5	Ebf1	Kcnd2	Nasp	Arhgap21	Ptprs	St8sia2	Trim2	Mapre1		Zranb2	Camkv	Kcnj9
	Mdga2	Rbfox3	Strip2	Hivep3	Gad2	Greb1l	Fam57b	Dclk2	Rbm39		Fut9	Trank1	Sdccag8
	Rtn1	Myt1l	Osbpl3	Zmym4	Brd3	Nrep	Mast1	Kirrel	Soga1		Phf24	Rgs17	Tmem63a
	Rgs6	Bcl11b	Tgfa	Sfpq	Wdr5	Gm5820	Gm35835	Gm3764	Sdc4		Plpp3	Map2k2	Dusp10
	Rbm25	Ryr2	Iqsec1	Phc2	Set	Ppp2r2b	Tmem200a	Mex3a	Prex1		Dhcr24	Dctn2	Prox1
	Rian	Erc2	Prickle2	Srsf4	Prrc2b	Ablim3	L3mbtl3	Tdrkh	Bcas1		Tesk2	Fstl4	Ppp2r5a
	Ptprn2	Nrg3	Foxp1	Ahdc1	Mvb12b	Flna	H2afy2	Bcl9	Rab22a		Hpcal4	Ksr1	Lpgat1
	Pfkp	Jph4	Cntn4	Hnrnpr	Pbx3		Ccdc88a	Igsf3	Gnas		Dlgap3	Asic2	Camk1d
	Dip2c	Hs6st3	Erc1	Arhgef10l	Dennd1a		Atxn1	Cttnbp2nl	Tbl1xr1		Hpca	Ankrd40	Prkcq
	Map1b	Rbfox1	Prmt8	Sema3c	Orc4		Smad5	Slc35a3	Sec62		Rap1gap	Plekhm1	Ankrd16
	Arl15	Prkce	Lmo3	Lhfpl3	Rif1		Mef2c	Tspan5	Pcdh10		Kif17	Rgs9	Stam
	Ptprg	Fbn2	Usp29	Smarcd3	Fmnl2		Gm17750	Ddah1	Mbnl1		Efhd2	Atg2b	Cacnb2
	Grid1		Gsk3a	Gtf3c2	Ssb		Rnf180	Fam110b	Arhgef26		Kazn	Mrs2	Plxdc2
	Gpc6		Sptbn4	Mrpl33	Dync1i2		Basp1	Runx1t1	Bcan		Per3	Phactr1	Pip4k2a
	Gm5089		Slc7a10	Crmp1	Hat1		Trio	Bach2	Pbxip1		Dnajc11	Ndrg2	Nelfb
	Nell2		Dlg2	Stk32b	Dlx1		Rbfox2	Igfbpl1	Rnf115		Kcnab2	Ptk2b	Anapc2
	Fgf12		Map6	Nsg1	Sp3os		Mpped1	Zfp462	Man1a2		Ajap1	Adra1a	Rabl6
	Epha6		Gas6	Ldb2	Hnrnpa3		Tuba1a	Nfib	Capza1		Dffb	Lmo7	Snapc4
	Robo1		Purg	Shroom3	Sestd1		Itsn1	Ssbp3	Plppr4		Cep104	Dock9	Sh3glb2
	Dscam		Neto2	Med13l	Celf1		Mdga1	Mast2	Cnn3		Cdk14	Kcnq3	Fnbp1
	Ptchd4		Nup93	Trafd1	Phf21a		Btbd9	Ptprf	Bcar3		Fam185a	Kcnj6	Dnm1
	Dlgap1		Kifc3	Cux2	Mir670hg		Spast	Foxo6	Papss1		Gm1043	Pcp4	Fam102a
	Nrxn1		A330008L17Rik	Clip1	Nat10		Cdh2	Marcksl1	Cisd2		Lgi2	Pde10a	Mapkap1
	Zfp521		Sntb2	Gtf2ird1	Hipk3		Dpysl3	Pum1	Dnajb14		Gltp	Zfp799	Gsn
	Dcc		Slc35f3	Radil	Qser1		Sncaip	Stmn1	Zzz3		Cit	Atp6v1g2	Ttll11
	Nrxn2		Irf2bp2	Dlx6os1	Pax6		Setbp1	Srsf10	Vcp		Tctn2	Lrfn2	Nr6a1
	Prkg1		Ets1	Ccdc136	Rtf1		Tle4	Kdm1a	Ctnnal1		Tmem132d	Fam98a	Lrp1b
	Htr7		Cspg4	Smo	Stard7		L1cam	Ephb2	Rnf11		Tsc22d4	Kif5b	Upp2
			Ephb1	Klhdc10	Pced1a		Sms	Ctnnbip1	Thrap3		Rac1	Arhgap26	Pkp4
			Amotl2	Ubn2	Ptpra			Rere	Man1c1		Ahcyl2	Camk2a	Chn1
			Hs3st5	Ezh2	Plcb4			Cdk11b	Aldh4a1		Wipf3	Neurl1a	Pde1a
			Grik2	Creb5	Manbal			Akap9	Igsf21		Sfxn5		Itgav
			Shc2	Slc6a1	Top1			Ptpn12	Dnajc16		9530026P05Rik		Dgkz
			Adcy1	Ptms	Gdap1l1			Kmt2c	Pcdh7		Setd5		Chst1
			Cobl	Ncapd2	Fam210b			Dpysl5	0610040J01Rik		Irak2		Emc7
			Ctc1	Ptpro	Rae1			Tbc1d1	Klf3		Wnk1		Fmn1
			Rab34	Amn1	Osbpl2			C530008M17Rik	Tmem33		Eno2		Chp1
			Dhx40	Brsk1	Dido1			Hnrnpd	Gabrb1		Rerg		Map1a
			Cacng4	Nova2	Arfgap1			Ttc28	Pdgfra		Fgfr1op2		Gatm
			Slc8a3	Opa3	Myt1			Coro1c	Parm1		Ppp6r1		Secisbp2l
			Jag2	Dpf1	Pkia			Msi1	Btbd8		Slc8a2		Mal
			Gmds	Ppfia3	Zfp704			Srrm4	Tmem175		Eml2		Mertk
			Trpc7	Lmtk3	Pde7a			Dtx1	Atp2a2		Xrcc1		Itpa
			Enc1	Gab2	Phc3			Kdm2b	P2rx4		Cic		Cenpb
			Rab3c	Usp35	Gria2			Cux1	Phkg1		Gpi1		Prnp
			Rarb	Spcs2	Pogz			Plod3	Gtf2i		Pnkp		Rassf2
			Cacna2d3	Rnf169	Zfp697			Nyap1	Eif4h		Ftl1		Chgb
			Cacna1d	Usp47	Hipk1			Zkscan1	Prkrip1		Fam189a1		Snap25
			Xkr6	Tead1	Celsr2			Ttyh3	Vgf		Sh3gl3		Dstn
			Dach1	Spon1	Tmem56			Sdk1	Mmd2		Pgm2l1		Rrbp1
			Fgf14	Pde3b	Camk2d			Tnrc18	Cdk8		Arhgef17		Nkx2-2os
			Cdh12	Fus	Cenpe			Nxph1	Stard13		Pde2a		Napb
			Fam49b	Sec23ip	Pkn2			St7	Dync1i1		Rpl27a		Cst3
			Grina	Tfdp1	Fubp1			Plxna4	Capza2		Htra1		Fkbp1a
			Poldip3	Gpat4	Chd7			Igf2bp3	Luc7l2		D7Ertd443e		Snph
			Cntn1	Stox2	Asph			Ctnna2	Pdia4		Ptpre		Bcl2l1
			Alcam	Zfp961	Pou3f2			Tia1	Fkbp9		Mapk1ip1		Trp53inp2
			Cadm2	Taf1d	Ankrd6			Podxl2	Grid2		Bet1l		Acss2
			Tiam1	Smarca4	Zfp292			Fbln2	Tcf7l1		Tmem80		2900097C17Rik
			Cacna1h	Kirrel3	Rusc2			Wnt7a	Paip2b		Taldo1		Snhg11
			Kcnh8	Clmp	Abca1			Frmd4b	Clstn3		Chid1		Ppp1r16b
			Fbxl17	Bcl9l	Fsd1l			Chl1	Cd9		Zmat4		Pkig
			Galnt14	Kmt2a	Whrn			Vhl	Etnk1		Enpp6		Dbndd2
			Gnal	Ube2q2	Tnc			Slc6a11	Itpr2		Wdr17		Sulf2
			Mapk4	Parp6	Frmd3			Rimklb	Ppfibp1		Psd3		Kcnb1
			Zbtb7c	Rab8b	Gm11266			Ccnd2	Fbxo46		Upf1		Tmem189
			Neto1	Zfp280d	Elavl2			Pde3a	Bckdha		Uba52		Ptpn1
			Kcnip2	Nedd4	Nfia			Sipa1l3	Clip3		Tom1		Rps21
			Atrnl1	Apc2	Scmh1			Nav2	Med25		Arhgap10		Tpd52
				Meis1	Stk40			Igf1r	Arrb1		Mmaa		Impa1
				Aff4	Txlna			Mfge8	Rab6a		Cx3cl1		Nceh1
				Ntn1	Khdrbs1			Crtc3	Dkk3		Smpd3		Cldn11
				Dvl2	Arid1a			Tenm4	Far1		Fa2h		Sox2
				Nlk	Hmgn2			Dchs1	Rras2		Map1lc3b		Serpini1
				Nf1	Fbxo42			Igf2	Tmc7		Rnf166		Mef2d
				Taf15	Prdm16			Sfrp1	Tollip		Tcf25		Rit1
				Myo19	Cdk6			Fgfr1	Bc1		Pdgfd		Pi4kb
				Brip1os	Gsap			Unc5d	Tubgcp3		Dcps		Otud7b
				Rps6kb1	Lmbr1			Nfix	Rasa3		Scn4b		Tspan2
				Luc7l3	Ctbp1			Orc6	Kat6a		Bace1		Rap1a
				Cacnb1	Wdr1			Tox3	Ddhd2		Sik2		Kcna2
				Top2a	Cc2d2a			Ctcf	Gpm6a		Rplp1		5330417C22Rik
				Ubtf	Sel1l3			Gse1	Clcn3		Tpm1		Stxbp3
				Cacng5	Ugdh			Spg7	Sh3rf1		Trf		Synpo2
				H3f3b	N4bp2			Tubb3	Cpe		Twf2		Ugt8a
				Mgat5b	Uba6			Nrp1	Csgalnact1		Poc1a		Unc5c
				Prkar2b	Ulk1			Cdon	Kxd1		Map4		Ttll7
				Nin	Sgsm1			Gramd1b	Colgalt1		Dclk3		Ak5
				Smoc1	Taok3			Dscaml1	Abce1		Wdr48		St6galnac3
				Nrxn3	Setd1b			Zc3h12c	Lonp2		Rpl14		Cnr1
				Evl	Denr			Islr2	Nkd1		Utrn		Mob3b
				Heatr1	Vps37b			Tle3	Chd9		Fyn		Cntfr
				Lpcat1	Cdk2ap1			Zfp609	Rspry1		Amd1		Tmod1
				Synpr	Rfc2			Phip	Mmp15		Rab36		Slc44a1
				Chd8	Vps37d			Syncrip	Bcar1		Snrpd3		Lpar1
				Zfhx2os	Brat1			Tmem108	Gan		S100b		E130308A19Rik
				Atp8a2	Hmgb1			Rbm5	Usp10		Pdxk		Snx30
				Fzd3	Phf14			Smarcc1	Afg3l1		Zbtb7a		Rgs3
				Klf12	Ptprz1			Ptprk	Itgb1		Matk		Rps6
				Dzip1	Rbm28			Rev3l	Cdc37		Ano4		Slc24a2
				Nipbl	Ube2h			Sec63	Igsf9b		Anks1b		Leprot
				Rai14	Ptn			Slc35f1	Opcml		Ptprb		Pde4b
				Ly6h	Cbx3			Fabp7	Thy1		Myl6		Acot11
				Csnk1e	Chn2			Sh3rf3	Scn2b		Osbp2		Agbl4
				Celsr1	Tet3			Hnrnph3	AI593442		Purb		Rnf220
				Zbed4	Dusp11			Plppr3	Idh3a		Sertad2		Map7d1
				Lmbr1l	1600020E01Rik			Midn	Fbxo9		B3gnt2		Ncdn
				Prpf40b	Plxna1			Pwp1	Myo6		Acyp2		Nkain1
				St6gal1	Chchd6			Vezt	Morf4l1		Col23a1		Trnp1
				Sema5b	Nup210			Plxnc1	Chst2		Sowaha		Rsrp1
				Gsk3b	Magi1			Ppfia2	Gnai2		Sparc		Clic4
				Epha3	Arl8b			Srgap1	Rhoa		Nlgn2		Camk2n1
				Zbtb9	Thumpd3			Cep68	Nckipsd		Pdk2		Padi2
				Srsf3	Vgll4			Bcl11a	Cspg5		Spop		Crocc
				Ehmt2	Tsen2			5730522E02Rik	Cx3cr1		Ppp1r1b		Kif1b
				Eml4	Phb2			Sh3pxd2b	Lars2		Thra		Spsb1
				Fbxo11	Gpr19			Rai1	Cnksr3		Msl1		Plekhg5
				Zeb1	Lockd			Kdm6b	Ust		Eif1		Rpl22
				Fhod3	Stk38l			Msi2	Sash1		Timp2		Nphp4
				Epb41l4a	Smg9			Cbx1	Epb41l2		Dtnb		Prkcz
				Jakmip2	Pou2f2			Pcgf2	Cep85l		Dgkb		Sdf4
				Ldb1	Shkbp1			Neurod2	Man1a		Daam1		Sema3e
				Cacul1	Shank1			Smarce1	Chst3		Ppm1a		Pclo
				Atp11c	Scaf1			Fam171a2	Psap		Sptb		Prkag2
				Mamld1	Luzp2			Slc39a11	Dazap1		Ppp4r4		Letm1
				Tab3	Chsy1			Ncoa1	Dot1l		Hsp90aa1		Mxd4
				Arx	Rgma			Sox11	Elk3		Crip2		Add1
					1810026B05Rik			Foxg1	Atp2b1		Actn2		Grk4
					Mir9-3hg			Syne2	Atxn7l3b		Gng4		Ablim2
					Sema4b			Dpf3	8430429K09Rik		Psma2		Sorcs2
					Iqgap1			Kcnk10	Ppp3r1		Zkscan3		Ppp2r2c
					Sec11a			Efcab11	Rtn4		Cap2		Stx18
					Acer3			Kif26a	Hba-a1		Lman2		Prom1
					Fchsd2			Sp4	Rnf145		Atg10		Kcnip4
					1700012D14Rik			2610307P16Rik	Mapk9		Pde8b		Limch1
					Arntl			Sox4	Canx		Sv2c		Atp8a1
					Sox6			Elovl2	Dlg4		Elovl7		Gabra4
					Plekha7			C130071C03Rik	Pafah1b1		Thrb		Usp46
					Eef2k			Gng2	Slc43a2		Nr1d2		Slc4a4
					Srcap			Kat6b	Sez6		Camk2g		Aff1
					Inpp5f			Arhgef40	Ap2b1		Nefm		Sparcl1
					Mcmbp			Msra	Usp32		Nefl		Tgfbr3
					Mki67			Farp1	Dynll2		Pcdh17		Brdt
					Nap1l4			Zhx2	Nfe2l1		Rictor		Cplx1
					Arhgef7			Mtss1	Stat3		Ankrd33b		Galnt9
					Vps36			Triobp	Cep112		Cpq		Hps4
					Pcm1			Tcf20	Axin2		Oxr1		2900026A02Rik
					Fat1			Atxn10	Gna13		Sult4a1		2210016L21Rik
					Hmgb2			Gramd4	Fam20a		Parvb		Cabp1
					Ncan			Plxnb2	Ttyh2		Slc2a13		Cox6a1
					Sugp2			Arid2	Sumo2		Tmem117		Rplp0
					1700030K09Rik			Slc38a2	Prpsap1		Kcnh3		Ksr2
					Dnaja2			Nectin3	Laptm4a		Mettl7a1		Rasal1
					Fto			Cblb	Ddx1		Sec14l5		Hip1r
					Adgrg1			Robo2	Ywhaq		Abat		Abcb9
					Nfatc3			Bach1	Dock4		Tango2		Pitpnm2
					Rfwd3			Hunk	Fut8		Hacd2		Ncor2
					Zcchc14			Ttc3	Gphn		Atp6v1a		Srrt
					Cbfa2t3			Hmgn1	Actn1		Sidt1		Gjc3
					Galnt2			Tiam2	Sel1l		Cpox		Pdgfa
					Trim67			Arid1b	Calm1		Sod1		Sun1
					Disc1			Telo2	Wdr37		Prr18		Adap1
					Maml2			Nudt3	Chrm3		Zfp40		Cox19
					Panx1			Usp49	Eci2		Grm4		Gna12
					Ilf3			Foxp4	Zfp169		Cpne5		Smurf1
					Bmper			Ankrd12	Shc3		Rftn1		Arpc1b
					Ncapd3			Memo1	Sncb		Tubb4a		Rnf6
					Ddx6			Map4k3	Cxcl14		Vapa		Rpl21
					Usp28			Slc8a1	Exoc3		Gm1976		Flt1
					Sin3a			Arhgap12	Arsb		Mib1		Ubl3
					Dis3l			Asxl3	Ankra2		Synpo		Ica1
					Igdcc4			Celf4	Nudt13		Htr4		Lncpint
					Igdcc3			Diaph1	Vcl		St8sia3		2210408F21Rik
					Herc1			Lmnb1	Arf4		Onecut2		Creb3l2
					Adam10			Nedd4l	Ankrd28		Zadh2		Hipk2
					Lca5			Ccbe1	Samd4		Tmem151a		Atp6v0e2
					Rasa2			Rnf165	Zfhx2		Atl3		Ppm1k
					Stag1			Dok6	Pspc1		Myrf		Nap1l5
					Wdr82			Ppp6r3	Tnfrsf19		Dagla		Gng12
					Cacna2d2			Incenp	Ebpl		Syt7		St3gal5
					Rbm6			Gnaq	Dleu2		Pip5k1b		Tgoln1
					Wdr6			Apba1	Pnma2		Cbwd1		Rtkn
					Setd2			Sorbs1	Elf1		Glis3		Tprkb
					Akap12			Jade3	9630013A20Rik		Atad1		Rab7
					Bclaf1			Dock11	Ednrb		Pten		Mgll
					Marcks			Rbmx	Gpc5		Exoc6		Slc6a6
					E130307A14Rik			Fgf13	Sub1		Lgi1		Mitf
					Lims1			Aff2	Myo10		Entpd1		Rybp
					Edar			Atrx	Sema5a		Cuedc2		Itpr1
					Mcu				Ncald		Hspa12a		Atp2b2
					Jmjd1c				Zfpm2		Syn1		Syn2
					Ccdc6				Trps1		Arhgef9		March8
					Gnaz				Taf2		Ftx		Rasgef1a
					Specc1l				Kcnk9				Adipor2
					Atcay				Cbx6				Ninj2
					Nfyb				Mlc1				Mical3
					Rfx4				Tmbim6				Iqsec3
					Btbd11				Ube2v2				Slc2a3
					Ntn4				Poglut1				Iffo1
					Tmtc2				Arhgap31				Gapdh
					Zfc3h1				Lsamp				Kcna1
					Lrp1				Zbtb20				Tspan9
					Pa2g4				Cd47				Gabarapl1
					Ewsr1				Ncam2				Tmtc1
					Emid1				Dyrk1a				Prkcg
					Egfr				Anks1				Rps9
					Rab1a				Ndufv3				Ttyh1
					Usp34				Cbs				Rpl28
					Nsg2				Hsp90ab1				Calm3
					Npm1				Cul7				Apoe
					Lsm11				Kdm4b				Ltbp4
					Cnot6				Khsrp				Sirt2
					Hnrnph1				Pja2				Aplp1
					Zfp354c				Ehd3				Mag
					Hnrnpab				Impact				Zfp536
					Skp1a				Aqp4				Josd2
					2310033P09Rik				Wdr33				Irf3
					Myh10				Gpr17				Rpl13a
					Glod4				Apc				Slc17a7
					Taok1				Pura				Otud7a
					Phf12				Sema6a				Klf13
					Supt6				Rnmt				Sv2b
					Psmd11				Ppp1ca				Pde8a
					Cdk5r1				Ltbp3				Cemip
					Ppm1e				Neat1				Aamdc
					Samd14				Gda				Pak1
					Kat7				Pank1				Dgat2
					Casc3				Btaf1				Plekhb1
					Gpatch8				Scd2				Apbb1
					Tlk2				Wbp1l				Ppfibp2
					Smurf2				Gfra1				Nrip3
					Pitpnc1				Pdzd8				Galnt18
					Psmd12				Bhlhb9				Mical2
					Map2k6				Eif1ax				Rps13
					Sdk2								Ccp110
					Gga3								Gprc5b
					Rnf157								Crym
					Srsf2								Prkcb
					Bahcc1								Cacng3
					Hgs								Gsg1l
					Atad2b								Ypel3
					Pum2								Aldoa
					Mboat2								Kctd13
					Rnf144a								Plekha1
					Pxdn								Jakmip3
					Cog5								Inpp5a
					Hdac9								Adgra1
					Etv1								Kndc1
					Arl4a								Rplp2
					Pnpla8								Dusp8
					Npas3								Cd81
					Fancm								Kcnq1ot1
					Trim9								Arhgef10
					Actr10								Slc20a2
					Syt16								Tacc1
					Ttc9								Lsm1
					Psen1								Rnf170
					Ccdc88c								Dusp26
					Setd3								Rnf122
					Rcor1								Dlc1
					Traf3								Slc25a4
					Cdc42bpb								Acsl1
					Eif5								Irf2
					Ppp1r13b								Spock3
					Fars2								Klhl2
					Dbn1								Ndufa13
					Ptch1								Rab3a
					Rhobtb3								Mast3
					Mblac2								Rpl18a
					Rasa1								Tmem38a
					Vcan								Gab1
					Ssbp2								Inpp4b
					Hmgcr								Rnf150
					Mier3								Nacc1
					Abhd6								Mt2
					Pdhb								Mt1
					Top2b								Pllp
					Dlg5								Ndrg4
					Zmiz1								Dync1li2
					Prkcd								Necab2
					Capn7								Cox4i1
					Sh3bp5								C230057M02Rik
					Peli2								Rpl13
					Mettl17								Pgbd5
					Mmp14								Endod1
					Zdhhc20								Icam5
					Cdadc1								Pde4a
					Dpysl2								Kank2
					Gtf2f2								Anln
					Tsc22d1								Sept7
					Diaph3								B3gat1
					Slitrk5								Jam3
					B930095G15Rik								Arhgap32
					Golph3								St3gal4
					March11								Nrgn
					March6								Usp2
					Pabpc1								Phldb1
					Ywhaz								Atp5l
					Asap1								Sik3
					Khdrbs3								Zbtb16
					Trappc9								Sema7a
					Csdc2								Nptn
					Scube1								Hexa
					Phf21b								Pkm
					Lncppara								Coro2b
					Dennd6b								Gm16759
					Ppp6r2								Dennd4a
					Kif21a								Clpx
					Gxylt1								Ppib
					Fmnl3								Rora
					Lima1								Unc13c
					Nr4a1								Fam214a
					Pcbp2								Gnb5
					Cbx5								Tmod2
					Hnrnpa1								Ick
					Mgrn1								Rasgrf1
					Usp7								Slc9a9
					Ypel1								Tfdp2
					Ppil2								Bfsp2
					Zfp148								Rpl29
					Gramd1c								Ip6k1
					Naa50								Bsn
					Boc								Ctdspl
					Cd200								Rpsa
					Senp7								Mobp
					Cxadr								Myrip
					Scaf8								9530059O14Rik
					Igf2r								Fyco1
					Airn								Plekhg1
					Fam120b								Map3k5
					Neurl1b								Map7
					Zfp523								Cdk19
					Mtch1								Foxo3
					Pde9a								Fam184a
					U2af1								Gja1
					Notch3								Serinc1
					Prrc2a								P4ha1
					Plcl2								Unc5b
					Satb1								Tspan15
					Efna5								Ctnna3
					Vit								Lrrtm3
					Svil								Zfp365
					Nol4								Fam13c
					Galnt1								Phyhipl
					Brd8								Dip2a
					Psd2								Adarb1
					Ankhd1								Trappc10
					Zfp608								Agpat3
					March3								R3hdm4
					Tcf4								Gpx4
					Ctif								Atp5d
					Sall3								Rps15
					Rtn3								Mbd3
					Fads2								Gng7
					Jak2								Chst11
					Hectd2								Chpt1
					Kif11								Tmcc3
					Plce1								Cpm
					Shtn1								Ctdsp2
					Usp9x								Kif5a
					Ddx3x								Rpl41
					Cask								Rps26
					Taz								Pik3ip1
					Tbl1x								Gal3st1
					Pola1								Ogdh
					Gpm6b								Tns3
													Sptbn1
													Slit3
													Trim41
													Sqstm1
													Ube2b
													Vdac1
													Sept8
													Rnf112
													Specc1
													Gas7
													Ndel1
													Rpl26
													Zbtb4
													Mink1
													Wscd1
													Aspa
													Prpf8
													Abr
													Git1
													Myo18a
													Aldoc
													Adap2
													Myo1d
													Rffl
													Rasl10b
													Bcas3
													Vmp1
													Ypel2
													Sept4
													Hlf
													Car10
													Ppp1r9b
													Skap1
													Arhgap23
													Srcin1
													Rpl19
													Cnp
													Dusp3
													Nsf
													Wipi1
													2610035D17Rik
													Hid1
													Recql5
													Sec14l1
													Cyth1
													Baiap2
													Aatk
													Nploc4
													Fasn
													Asxl2
													Dnmt3a
													Dnajc27
													Stxbp6
													Arhgap5
													Nfkbia
													Prkch
													Plekhg3
													Rab15
													Plekhh1
													Galnt16
													Sipa1l1
													Jdp2
													Foxn3
													Kcnk13
													Psmc1
													Slc24a4
													Itpk1
													Prima1
													Clmn
													Cyp46a1
													Eml1
													Begain
													Meg3
													Ckb
													Apopt1
													Inf2
													Pacs2
													Elmo1
													Zscan26
													Dusp22
													Slc22a23
													Smim13
													Kif13a
													Fgd3
													Bicd2
													Sema4d
													Diras2
													Cplx2
													Klhl3
													Cdc14b
													Adcy2
													Tppp
													Ell2
													Edil3
													Thbs4
													Homer1
													Arhgef28
													Mast4
													Rgs7bp
													Zswim6
													Snx18
													Hmgcs1
													Fhit
													Rpl15
													Usp54
													Ap3m1
													Zcchc24
													Gm26782
													Slc22a17
													Cmtm5
													Lats2
													Clu
													Stmn4
													Ppp2r2a
													Lgi3
													Htr2a
													Tpt1
													Serp2
													Pcdh9
													Abcc4
													Mbnl2
													Rap2a
													Oxct1
													Brix1
													Ank
													Samd12
													Enpp2
													Deptor
													Fbxo32
													Ndufb9
													Sqle
													Lynx1
													Nrbp2
													Plec
													Kifc2
													Rpl8
													Micall1
													Polr2f
													Sox10
													Gm10863
													Tmem184b
													Syngr1
													Rbx1
													Tef
													Tob2
													Aco2
													Pmm1
													Desi1
													5031439G07Rik
													Trmu
													Prickle1
													Rapgef3
													Slc48a1
													Arf3
													Ddn
													Faim2
													Scn8a
													Pde1b
													Adcy9
													Coro7
													Carhsp1
													Grin2a
													Litaf
													Spag6l
													Tmem191c
													Dgkg
													Il1rap
													Acap2
													Apod
													Dlg1
													Tnk2
													Adcy5
													Fam162a
													Igsf11
													Ccdc191
													Rpl24
													Htr1f
													App
													Synj1
													Olig1
													Atp5o
													Cldn14
													Zdhhc14
													Synj2
													Gm1604a
													Qk
													Gm16168
													Agpat4
													Lix1
													Pdpk1
													Atp6v0c
													Rps2
													Sox8
													Fbxl16
													Rab40c
													Crebrf
													Pacsin1
													Akap8l
													Brd2
													Ddr1
													Mog
													Rcan2
													Runx2
													Ccnd3
													Tfeb
													Daam2
													Kat2b
													Safb2
													Rab31
													Epb41l3
													Strn
													Calm2
													Osbpl1a
													Mapre2
													Gm33228
													Bin1
													Camk4
													Reep5
													Egr1
													Nr3c1
													Kctd16
													Prr16
													Gm4221
													Gramd3
													Slc12a2
													Rps14
													Slc6a7
													Ppargc1b
													Atp8b1
													Rpl17
													Smad7
													St8sia5
													Pstpip2
													Mbp
													Sptbn2
													Malat1
													Fau
													Snx15
													Macrod1
													Flrt1
													Cox8a
													Ahnak
													Asrgl1
													Fth1
													Prpf19
													Zfp91
													Vps13a
													Abhd17b
													Klf9
													Kank1
													Cdc37l1
													Pcgf5
													Cpeb3
													Opalin
													Cnnm2
													Slk
													Add3
													Mxi1
													Vti1a
													Tcf7l2
													Zfp950
													Pcsk1n
													Atp2b3
													Plxnb3
													Gab3
													Iqsec2
													Cnksr2
													Map7d2
