# Supplementary material for: Spatial dynamics of mammalian brain development and neuroinflammation by multimodal tri-omics mapping
Source: Research Square preprint supplement (doi:10.21203/rs.3.rs-4814866/v1), 2024-08-11
Supplement: Supplementary file 2 [file 9cd795e24fa6f52b2c9f6b1e.xlsx]

## Sheet: Sheet1
R1_A2	R2_A2	R2_A6	R3_A1	R3_A4	R4_A1	R4_A7	R5_A3	R6_A2	R7_A4	R8_A4	R9_A2	R9_A4	R9_A7	R10_A1	R10_A2	R10_A4	R10_A6	R11_A2	R11_A4	R11_A6	R12_A3	R12_A4	R12_A5	R13_A1	R13_A3	R13_A6
Kcnb2	Myo1b	Jph1	Pgap1	Agap1	A830018L16Rik	Cacna1e	Sulf1	Dst	Stk25	Rapgef2	Fam135a	Arfgef1	Hspd1	Xkr4	Vwc2l	Gm26901	Zfp451	Rb1cc1	Hdac4	Smap1	Ogfrl1	Creg2	Sphkap	Hecw2	2010300C02Rik	Brinp3
Cacna1b	Epha4	Nucks1	Bcl2	Lemd1	Thsd7b	Rprm	B3gat2	Hs6st1	Npdc1	Sars	Fam168b	Bend6	Serpine2	Prim2	Dner	Slco5a1	Tmem131	Gdap1	Gm29514	Gls	Tuba4a	Fam126b	Mgat5	Itm2c	Fhl2	Atp1b1
Klhl23	Fam163a	Kcnh1	Xpr1	Smyd3	Tlk1	Ryr3	Col19a1	Gm29260	Eif2ak4	Rps20	Npas2	Cnnm3	Nav1	Ankrd44	Ralgps2	Stau2	March4	Mfsd6	Uhmk1	Raph1	Ptprn	Cdk5r2	R3hdm1	Rgs4	Ngef	Kcnj9
Osbpl6	Ccdc3	Kcnh7	Pappa2	Plxna2	Gnas	Syt6	Tmeff2	Gm28175	Nop56	Trmt10b	Tpp2	Bmpr2	Slc24a3	Klf7	Nvl	Khdrbs2	Pam	Coq10b	Fmn2	Ndufs1	Farp2	Syt2	Mfsd4a	Nos1ap	Nfasc	Susd4
Gm13986	Gpr158	B3galt1	Cnih3	Lypd6b	Fndc3b	Mmp16	Nrp2	Pantr1	Ints3	Csmd2	Bzw1	Igfbp5	Top1	Idh1	Cers6	Aff3	Ubxn4	Trak2	Mllt10	Dync1i2	Glul	Ildr2	Atp1a2	Cacnb2	Brinp2	Camk1d
Gm20754	Ptprj	Chn1	Lypd6	Tbr1	Slc7a14	Nfia	Tmem163	Pou3f3	Ipo13	Pqlc2	Atg4b	Agfg1	Rap1a	Erbb4	Sestd1	Tbc1d8	Gm4258	Abi2	Nacc2	Fam171b	Ndufs2	C1ql3	Arhgap15	Dnm1	Tnr	Rasgrp1
Ankrd6	C1qtnf4	Btbd3	Grb14	Meis2	Col24a1	Spsb1	Atp2b4	Igsf9	Noc2l	Necap2	Rnf152	Arl4c	Dnaja1	Gpr161	Pcif1	Map4k4	Csrnp3	Rab3gap1	Nostrin	Gpcpd1	Lpgat1	Kcnj3	Galnt13	Pde1a	Stum	Snap25
Itpr1	Slc23a2	Arhgap29	Zfp804a	Xkr7	Pik3r3	Antxr1	Rgs8	Cadm3	Cdk5	Tmed5	Klhl12	Cops8	Grin3a	Usp21	Sfpq	Gpr45	Hnrnpa3	Rgs5	Mir670hg	Eif2s2	Grin1	Celf1	Emc7	Kcnip3	Olfm1	Snhg11
Srgap3	Plcb1	Lrrc7	Sema6d	Dlgap4	Wasf2	Klf13	Nr4a2	Aim2	Pitpnb	Ube3b	Kif21b	Gpc1	Plaa	Vav2	Lhfpl3	Nck2	Ube2e3	Desi2	Pdia3	Ywhab	Stxbp1	Chst1	Fmn1	Mal	Dab2ip	Astn2
Grin2b	Syndig1	Rragd	Sulf2	Nnat	Chd5	Iqgap1	Ptprt	Zbtb18	Ints1	Pxn	Kifap3	Capn10	Slc7a1	Fmnl2	Fam193a	Satb2	Pla2g4e	Rab14	Ndrg3	Dnajc5	Slc4a10	Scg5	Itpka	Plcb4	Ttll11	Efhd2
Plekha5	Ppp1r16b	Slc44a1	Kcng1	Cdh4	Sema3e	Plekha7	Sox2ot	Celf2	Rbm28	Ddx54	Esrrg	Mapkapk2	Far2	Frmd5	Epha5	Map2	Ubr1	Ssb	Rab22a	Lekr1	Rapgef4	Dzank1	Lamp5	Cst3	Cacnb4	Ppp2r2c
Rras2	Ptgfrn	Brinp1	Gnb4	Tnik	Rell1	Xylt1	Col11a1	Pip4k2a	Xpc	Srrt	Kcnk2	Ppfia4	Purg	Myef2	Anapc5	Igfbp2	Fbn1	Atf2	Sec62	Rap1gds1	Madd	Nceh1	Stmn3	Abhd18	Upp2	Cwh43
March1	Sort1	Raver2	Plppr5	Kcnn3	Usp46	Hs3st4	6530403H02Rik	Rpl7a	Chmp2a	Copg1	Usp6nl	Tmem183a	Lonrf1	Macrod2	Caln1	Cul3	Mir124-2hg	Eid1	Pgrmc2	Ptp4a2	Cry2	Ttc14	Sv2a	Kcna2	Dgkz	Cplx1
Kirrel3	Hs2st1	Sel1l3	Ddah1	Kcnd3	Fbrsl1	Gse1	Col25a1	Ntng2	Rab4b	Rps5	Garnl3	Camsap2	Vat1l	H13	Chn2	Ncl	Frem2	Tmx4	Mrpl9	Luzp1	Syt13	Pcdh10	Atp1a1	Gabbr2	Prr5l	Rph3a
Ccdc85a	Asph	Atp8a1	St6galnac5	Fam110b	Galnt9	Nrp1	Slc44a5	Zbtb34	Tbc1d17	Emc10	Epc2	Edem3	Atp2c1	Pdrg1	Usp29	Ptma	Csde1	Mapre1	Slc16a1	Sept11	Bdnf	Pbxip1	Prkacb	Epb41l4b	Ppip5k1	Tmem132d
Adamts2	Gm12371	Cttnbp2	Shb	Epha7	Mmp17	Peak1	Ptpru	Lhx2	Dpysl4	Pnkp	Prpf40a	1700025G04Rik	Rnf217	Ncoa5	Lig1	Dtymk	Trim33	Rbm39	Celsr2	A330076H08Rik	Map1a	Npnt	Ptpn3	Susd1	Mertk	Mtus2
Mllt6	Epha10	Fam189a1	Nr4a3	Coro2a	Arhgap25	Lrrc1	Igsf21	Acvr1c	Pik3r2	Ftl1	Caprin1	Smg7	Slc17a8	Zfp704	Slco3a1	Nckap5	Gpsm2	Phc3	Sigmar1	Dlg2	Rims4	Lmo4	Srpk2	Dnajc6	Sirpa	St3gal5
Kcns3	Ajap1	Rnf150	Sh3gl2	Nfib	Kcna6	Osbpl10	Sez6l	Rbms1	Fcho1	Gm32786	Nol4l	Tiprl	Usp15	Pde7a	Sox6	Srgap2	Snx7	Atp11b	Vcp	Acer3	Slc12a5	Tmem245	Actr3b	Hpcal4	Prnp	Gabarapl1
Sntg2	Sorcs2	Maf	Elavl2	Foxo6	A230057D06Rik	Wdpcp	Grm5	Dlx1as	Cherp	Ctxn1	Ralgapb	Enah	Rtn4	Arhgef26	Cog7	Cntn2	Ank2	Glrb	Rnf11	Clcn3	Kcnb1	Frrs1l	Cit	Plekhg5	Chgb	Me3
F730043M19Rik	Nwd2	Fat3	Ssbp3	Arhgef10l	Akap13	Rapgef6	Tenm4	D430041D05Rik	Trmt1	Fkbp8	Tshz2	Slc30a10	Ublcp1	Fnip2	Maml2	Pik3c2b	Cxxc4	Tpm3	Kpna6	Dmxl2	Bcas1	Zdhhc21	N4bp2l1	Kcnab2	Napb	Galnt18
Rgs6	4930467D21Rik	Dock3	Grik3	Grm3	Ptpre	Gas7	Rasa3	Shf	Hook2	Ccdc124	Maml3	Nmt2	Nf1	Pdgfc	Ppp2r3a	Ivns1abp	Bmpr1b	Atp5f1	Paqr7	Scg3	Rps21	5730409E04Rik	2210408F21Rik	Slc4a4	Snph	Spock3
Tshr	Lrrc8c	Man1a	Kctd8	Smarcd3	Fam155a	Rap1gap2	Inpp4b	Vstm2l	Tmem208	Rpl18a	Golim4	Ankrd16	Etv1	Sh3d19	Cpne4	Dnm3	Adgrl2	Bcar3	Sdhb	Stag1	Tpd52	Ece1	Herc3	Rasgef1b	Pkig	Slc35f3
Adarb2	Pitpnm2	Nav3	Srrm3	Dpp6	Bbs9	Cep112	Gria4	B4galt5	Tcf3	Bbs2	Mllt11	Ubac1	Nrcam	Dclk2	Stt3b	Fam78b	Mms22l	Impad1	Nub1	Sash1	Pip5k1a	Slit2	Nap1l5	Mapk10	Cdh22	Sik3
Adgrv1	Col26a1	Ppm1h	Hipk2	Ldb2	Col12a1	Dtnb	Grik4	Dok5	Rexo1	Slc7a6os	Lrig2	Sec16a	Stmn4	Tdrkh	Ppp1r14c	Uck2	Tnc	Map3k7	Lgi2	Akap7	Ppp3ca	Ppargc1a	Atp2b2	Hrk	Tmem189	Exph5
Klhl1	Cadps2	Hspa4	Sox5	Tmem132c	Ipcef1	Cys1	Megf11	Bhlhe22	Sppl2b	Cdc37	Capza1	Cacfd1	Rb1	Cnn3	Fabp7	Aldh9a1	Adamtsl1	Slc25a51	Cdkl2	Igf1	Ttll7	Cds1	Pparg	Tmem132b	Zfp831	Trank1
Alcam	Tmem178b	Dcaf5	Prkcg	Actl6b	Cnksr3	Zmiz1os1	9530059O14Rik	Fat4	Matk	Keap1	AI504432	Brd3	Azin1	Tet2	Lims1	Pbx1	Mllt3	Ugcg	2900026A02Rik	Trhde	Zranb2	Lrrc8b	Apba2	Rimbp2	Schip1	Arfgef3
Nrip1	Ephb6	Ntrk2	Eml2	Sdk1	Slc16a10	Cacna1d	Chst11	Lhfp	Fzr1	Smad3	Fam102b	Urm1	Cxadr	Ptger3	Ccdc88a	Vangl2	Klhl5	Snx30	Sgsm1	Psme4	Phf24	Adap1	Tjp1	Ppp1r9a	Ak5	Lrrtm3
Btbd9	Osbpl3	Pde8b	Chst8	Foxp2	Ptprr	Rai14	Tmcc3	Zfp697	Nacad	Tex264	Tox	Set	Rgmb	Nkain3	Cdkl3	Cep170	Ube2k	Zyg11b	Atp2a2	Arhgap44	Whrn	Dennd5b	Sv2b	Mgll	Tmod1	Bicc1
Dlgap1	Pdzrn3	Pik3r1	Vstm2b	Nfe2l3	Eml6	Ptk2	Sgcd	Necab1	Flii	Cnot10	Aptx	Tbc1d13	Ptprm	Cdk5rap2	Ulk2	Kif26b	Hmgb1	Cdc42	Bri3bp	Vmp1	Atp6v0b	Calm3	Zmat4	Iqsec1	Ttc39b	Syt1
Mapk4	Cpne9	Ube2e2	Spon1	Nup210	Ksr1	Prickle1	Gria1	Pou3f2	Rab34	Btbd2	Dnajc25	Rc3h2	Fmr1	Cachd1	Flot2	H3f3a	B3glct	Rab28	Ywhag	Rock2	AU040320	Ltbp4	Klhl2	Magi1	Trabd2b	Tom1l2
Slc16a2	Plxnd1	Ankrd28	Hs3st2	Xrcc1	Skap1	Htr1f	Hpcal1	B4galt1	Slc35b1	Ctdsp2	Elavl4	Rabgap1		Usp24	Cuedc1	Vash2	Trim24	Dcun1d4	Luc7l2	Sel1l	Hpca	Cemip	Tmem38a	Rasgef1a	Rnf220	Specc1
	Mical3	Gpr137c	Neto2	Pou2f2	Sdk2	Dscam	Cntnap3	Zfp462	Adam11	Trim41	Gnb1	March7		Mast2	Smarce1	Fam107b	Igf2bp3	Evi5	Clstn3	Homer1	Rap1gap	Tacc1	Nr3c2	Tpi1	Dlgap3	Ttc19
	Tspan9	Dgkh	Cog8	Tshz3	Eml5	Prkce	Ptprg	Rgs3	Cep131	Gps2	Ppp1cb	Rbm45		Macf1	Kidins220	Frmd4a	Znrf2	Vps29	Mlf2	Arhgef3	Camk2n1	Nup93	Chd9	Peg3	Extl1	Asic2
	Nell1	Uggt2	Cntnap4	Sergef	Wdr37		Erc2	Zswim5	Crip2	Ift20	Cpeb2	Zdhhc5		Epb41	Dpf3	Ehmt1	Smarcad1	Cdk8	Cops7a	Trps1	Crocc	Sept7	Dync1li2	Slc8a2	Man1c1	Rprml
	Unc5d	Cdh6	Cdh13	Igf1r	Kif13a		Shisa9	Rps8	Ice1	Med24	Srp72	Nat10		Reln	Pfkp	Gpsm1	Cntn6	Hsph1	Kcna1	Tmem117	Mthfr	Rab6b	Arhgap32	Apoe	Nphp4	Actn1
	Zdhhc2	St13	B3gat1	Rgma	Shc3		Pdia5	Hivep3	Cpsf1	Trappc12	Fras1	Lin7c		Tbc1d19	Rnf180	Fam129b	Cacna1c	N4bp2l2	Etnk1	Nr4a1	Clstn1	Lars2	Nrgn	Gpi1	Prkag2	Numb
	A330008L17Rik	Slc2a13	Scn3b	Ntrk3	Nalcn		Sema5b	Gm2164	Polr2f	Ift43	Bcl7a	Ptpra		Adgrl3	Parp8	Zeb2	Etv6	Capza2	Myadm	Airn	Camta1	Pcmt1	Usp2	Snhg14	Zfyve28	Meg3
	Pcnx2	Fyttd1	Csk	Map6	Sema5a		Galnt14	Pou3f1	Lztr1	Cplx2	Stx2	Chmp4b		Lrrc8d	Pbrm1	Acvr1	Lrp6	Klhdc10	Zfp787	Man2a1	Prkcz	Wasf1	Scn2b	Prkcb	Ablim2	Rian
	St3gal4	Cdh2	Islr2	Evi5l	Rspo2		March3	Zfp46	Ifnar1	Fam193b	Vkorc1l1	Src		Fbxo21	Micu2	Fnbp4	Prmt3	Serbp1	Zfp667	Hnrnpll	Gabrd	Cdk17	Zbtb16	Gsg1l	Gabra4	Ranbp9
	Pknox2	Syt4	Tex9	Fgfr1	Khdrbs3		Sorcs3	Cdk6	Caskin1	Vps28	Dnaaf5	Pmepa1		Phf14	Dzip1	Trp53i11	Usp47	Mkrn2	Pnmal2	Calm2	Slc30a3	Kitl	Map7	Adgra1	Ociad2	Adcy2
	Rora	Sema6a	Samd5	Kmt2a	Etv5		Gfra1	Cacna2d1	Lemd2	Tmem184b	Zfp398	Ogfr		D630045J12Rik	Dock9	Tspan18	Gga2	Tulp3	Gm42372	Mib1	Nat8l	Sptbn1	Pde7b	Kcnq1ot1	Sparcl1	Rgs7bp
	Mthfs	Vldlr	Timp3	Fxyd6	Dgkg			Nelfa	Skiv2l	Ndufa7	Zfp746	Pkia		Grip2	Cdh10	Qser1	Mcmbp	Cnot3	Ppp5c	B4galt6	Tpst2	Vdac1	S100b	Arhgap10	Ksr2	Adk
	Susd5	Gpm6b	Apaf1	Dscaml1	Tmem178			Afap1	Dus3l	Abhd16a	Lmo3	Stmn2		Erc1	Arid2	Mpped2	Fat1	Zfp329	Tomm40	Gm33228	Cabp1	Akap5	Cfap54	Sorl1	Lncpint	Samd4
	Mthfd1l		Col23a1	Cadm1	Crtac1			Pcdh7	Mllt1	Dpp9	Kras	Fxr1		Rerg	Ece2	Trp53bp1	Opcml	Pdcd5	Irgq	Mcc	Rasal1	Nrxn3	Osbp2	Lingo1	Wipf3	Htr2a
	Arhgef25		Tmem132e	Ephb1	Gnl3l			Limch1	Gtf2f1	Lonp1	U2af2	Naa15		Fiz1	Igf2bp2	Pced1a	Rdx	Ube3a	4732471J01Rik	Chm	Tsc22d4	Nsun2	Mdh1	Ctnna3	Syn2	Mbnl2
	Fstl4		Arhgap23	Tmem108				Bend4	Cxxc1	Klc2	Gabra5	Dclk1		2310002F09Rik	Lrch3	Rnf24	Arpp21	Far1	Gys1		Tmem229a	Abhd6	Sept8	Anks1b	Eno2	Ankrd33b
	Rtn4rl1		Tanc2	Slc35f1				Tec	Ppp2r5b	Osbp	Ndn	Tiparp		Shank2	Diaph1	Xrn2	2900079G21Rik	Arl6ip1	Gabrb3		Ahcyl2	Nefl	Rnf112	Ogdh	Gapdh	Mal2
	Hlf		Pitpnc1	Pcdh15				Cep135			Emsy	Scamp3		Zfp266	Ablim3	Ggt7	Reps1	Plekha1	Snrpn		Ppm1k	Sult4a1	Car10	Acyp2	Mag	Fam135b
	Rbfox3		2610035D17Rik	Srgap1				Antxr2			Ap2a2	Nras		Msantd2	Trpc5	Soga1	Fyn	Scoc	Rab6a		Sfxn5	Arf3	Vsnl1	Pitpnm3	Slc17a7	Pdzrn4
	Kcnh5		Nin	Dnah2				Prdm8			Hook3	Cttnbp2nl		Ick	Ctps2	Ntsr1	Bend3	Csnk2a2	Stim1		Mitf	Mapk1	Rab15	Nlk	Kcnc1	Acap2
	Jdp2		Slc8a3	Sez6				Asphd2			Galntl6	Wdr47		Rasa2		Col9a3	Ank3	Hspa8	Fam160a2		Ttyh1	Mpc1	Atp6v1d	Rhbdl3	Syt17	Gm16168
	Rapgef5		Flrt2	Stard3				Cux2			Msmo1	Fnbp1l		Acvr2b		Rtel1	Ube2d1	Elovl4	Mical2		Nat14	Camk4	Cap2	Ypel2	Crym	Slc6a7
	Nr2f1		Bcl11b	Rnf157				AI480526			Gatad2a	Sh3glb1		Akap12		Mrps28	Ppfia2	Slc25a36	Dusp8		Epn1	Rab27b	Ell2	Ppm1e	Dlgap2	Vps13a
	A830082K12Rik		Kif26a	Cog5				Clip2			Tbc1d9	Unc13b		L3mbtl3		Pag1	Cenpv	Dag1	Bc1		Pnmal1	Chrm1	Fbxo34	B230217C12Rik	Sorbs2
	Kcnma1		Vcan	Heatr5a				Sh2b2			Prkaca	Rusc2		Cpsf6		Kcnmb2	Med13	Dync1li1	Pet100		Atp1a3	Lgi1	Slc7a8	Cygb	Irf2
	Slc35f4		Arhgef28	Mdga2				Cux1			Slc38a7	Msantd3		0610010F05Rik		Spata5	Cbx1	Atxn7l3b	Gtpbp3		Erf	Syp	Ptk2b	Mafg	Mast3
	Hs6st3		Fezf2	Ror2				Ccdc136			Galns	Slc31a1		Taf15		Mfsd8	Ddx5	Cs	Adgrl1		Pld3	Pcdh11x	Oxct1	Rab40b	Cx3cl1
	Fgf14		Dlg5	Trpc7				Ptn			Ddx6	Wdr31		2410018L13Rik		Trpc4	Map2k6	Actr2	Calr		Cox6b1	Map7d2	Asap1	Trim9	Sntb2
	Adcy8		Zmiz1	Mctp1				Add2			Sik2	Zfp618		Map3k9		Trim2	G2e3	Fbxw11	Nfat5		Kcnc3		Nptxr	Galnt16	Trpc6
	Cacna1i		Nrg3	Kat6b				Pcbp1			Ireb2	Megf9		Kcnk10		Nes	Snx6	Pank3	Kcnk1		Lin7b		Scn8a	Phactr1	Rasgrf1
	Fgf12		Klf12	Grid1				Prickle2			Scamp5	Frmd3		Dbn1		Gm3764	Ppp2r5e	Lsm11	Sesn3		Snrnp70		Grin2a	Diras2	Slc9a9
	Boc		Pdzd2	Osgep				Foxp1			Adam10	Slc6a9		Tnpo1		Mex3a	Dip2c	Ppp2ca	Idh3a		Otud7a		Igsf11	Klhl3	Mras
	Plcxd2		Pvt1	Atp8a2				Vgll4			Rfx7	Ptprf		Map1b		Thbs3	Simc1	Mfap3	Nptn		Cpeb1		Sidt1	Cdc14b	Bsn
	Kcnj6		Ptchd4	Enox1				Chd4			Dzip1l	Ago1		Slc4a7		Snx27	A530065N20Rik	Sh3bp5l	Tmod2		Pde2a		App	Iqgap2	Ctdspl
	Dact2		Celf4	Ctnnd2				Ybx3			Prkar2a	Trim62		Gng2		Pogz	2210408I21Rik	Pafah1b1	Morf4l1		Cckbr		Zdhhc14	Arhgap22	Mobp
	Grm4		Kcnn2	Ext1				Eps8			Gm36251	Rnf19b		Mrpl52		Sema6c	Fcho2	Taok1	Chst2		Nrip3		Rcan2	Ndrg2	Myrip
	Osbpl1a		Chsy3	St3gal1				Tmtc1			Hs3st5	Pum1		Fam124a		Bcl9	Dennd6a	Cdk5r1	Slc38a3		Dkk3		Runx2	Nefm	Cck
	Prr16		Apcdd1	Srebf2				Mypop			Grik2	Sdc3		Kif13b		Igsf3	Exoc5	Ap2b1	Mon1a		Ypel3		Epb41l3	Nipal2	Lyzl4
	Spire1		Dcc	Wnt7b				Fbxo46			Ascc3	Srsf4		Tdrd3		Magi3	Gsk3b	Usp32	Camkv		Aldoa		Kcnk12	Deptor	Zfp365
	Zbtb7c		Neto1	Lsamp				Lrp3			Ccar1	Rps6ka1		Smug1		Gnai3	Grik1	Msl1	Tma7		Cend1		Gm1976	Adgrb1	Trpm2
	Prkg1		Sipa1	Hunk				Trpm4			Tmtc2	Nol9		Tvp23a		Vav3	Srsf3	Rapgefl1	P4ha1		Mob2		Nr3c1	Gm10863	Hcn2
	Kcnip2		Tle4	Tiam2				Slc17a6			Kcnmb4	Rundc3b		St6gal1		Ptbp2	Efna5	Asxl2	Spock2		Cd81		Rps14	Adcy9	Kif5a
			Slit1	Slc37a1				Luzp2			Znrf3	Mob1b		Epha3		Elovl6	Memo1	Trib2	Tmem259		Map2k7		Fth1	Pi4ka	Slit3
				Pde9a				Arntl			Ehbp1	G3bp2		2700054A10Rik		Unc5c	Dhx57	Tspan13	Celf5		Cpe		Klf9	Smoc2	Bcas3
				Ptk7				Fgfr2			Xpo1	Scarb2		Lrfn2		Gipc2	Sos1	Hectd1	Atp2b1		Tmem59l		Pcgf5	Egr1	Nsf
				Foxp4				Efnb2			Aff4	Cnot6l		Ranbp3		Fubp1	Camkmt	Arhgap5	Adcy1		Ssbp4		Atp2b3	Syt7	Sipa1l1
				Crim1				Myo16			Cdc42se2	Hnrnpd		L3mbtl4		St6galnac3	Fbxo11	Sstr1	Sertad2		Rab3a		Arhgef9	Hspa12a	Slc24a4
				Svil				Tenm3			Dhx33	Trafd1		Srsf7		Runx1t1	Fam13b	Fut8	Aftph		Ocel1			Syn1	Clmn
				Ppp2r2b				Vegfc			Suz12	Zfp664		Map4k3		Faxc	Zfp608	Dlst	Gabrb2		Abhd8				Tppp
				Dok6				Gpm6a			Appbp2	Fbxl18		Slc8a1		Bach2	Ccbe1	Hsp90aa1	Ube2b		Unc13a				Arsb
				Smarca2				Lpl			Casc3	Nxph1		Arhgap12		Cnr1	Glis3	Eif5	Sparc		Cacna1a				Mast4
								Bean1			Becn1	Ptprz1		Rock1		Rnf38	Rbmx	Larp4b	Chd3		Dand5				Cacna2d3
								Rhou			Fam49a	Impdh1		Asxl3		Igfbpl1	Fgf13	BC005537	Zbtb4		Ndrg4				Clu
								Ubl5			Ywhaq	Snx10		Apba1		Col15a1	Pls3	Tubb2a	Dlg4		Il34				Phyhip
								Rp9			Irf2bpl	Vopp1		Atp11c		Tgfbr1	Pola1	B230219D22Rik	Nufip2		Pgbd5				Oxr1
								Gramd1b			Klf6	Snrpg		Flna		Tmeff1		Nisch	Cltc		Icam5				Samd12
								Nectin1			Gmds	Chchd4		Nono		Plppr1		Fzd3	Kat7		Pde4a				Enpp2
								Sema7a			Ripk1	Slc6a11		Tmem164		Fsd1l		Pcdh17	Spop		Igsf9b				Lynx1
								Tle3			Hivep1	Rimklb		Klf8		Pakap		Dnajc3	Nfe2l1		Aplp2				Tef
								Anp32a			Spock1	Ccnd2		Sms		E130308A19Rik		Rap2a	Socs7		Robo3				Faim2
								Mlip			Agtpbp1	Strap				Dab1		Lmbrd2	Prkar1a		Thy1				Aifm3
								Clstn2			Arrdc3	Prpf31				Lrp8		Sub1	Kctd2		Fam81a				Il1rap
								Rassf1			Tmem161b	Tsen34				Svbp		March6	Timp2		Hivep2				Kalrn
								Eif1b			Hmgcr	Zfp865				Ybx1		Phf20l1	Rab10os		Fam229b				Pde10a
								Tmem200a			Slc30a5	Zfp444				Trit1		Ago2	Rtn1		Psap				Srrm2
								Rpf2			Kif2a	Nova2				Marcksl1		Usp7	Tmem63c		Rrp1				Akap8l
								Sh3rf3			Rab3c	Pvr				Khdrbs1		Txndc11	Mirg		Med16				Trerf1
								Arid5b			Appl1	Cadm4				Nkain1		Dnm1l	Klc1		R3hdm4				Ccnd3
								Smarcb1			Mapk8	Zfp428				Arid1a		Senp5	Gng4		Abca7				Safb2
								Dazap1			Bmpr1a	Gsk3a				Pdik1l		Dzip3	Bicd2		Atp5d				Kctd1
								Mbd3			Ccser2	Cic				Stmn1		Zfp52	Sgtb		Rps15				Sil1
								Lsm7			Zmym2	Snrpa				Srsf10		Mapk14	Samd8		Uqcr11				Pcdhgc5
								Ncln			Zdhhc20	Numbl				Kdm1a		Pja2	Mtmr6		Abhd17a				Camk2a
								D10Wsu102e			Kpna3	Shkbp1				Ephb2		Ndufv2	Ints6		Csnk1g2				Mbp
								Nuak1			Lrch1	Zfp84				Draxin		Wac	Ndfip2		Gng7				Syt12
								Btbd11			Rbm26	Uba2				Mad2l2		Ube2d2a	Ywhaz		Slc39a3				Malat1
								Nudt4			Npr3	4931406P16Rik				Exosc10		Ndfip1	Slc45a4		Zbtb7a				Pip5k1b
								Slc16a7			Basp1	Ankrd27				Rpl22		Ndst1	Cd47		Zfr2				Neurl1a
								Slc1a4			Ncald	A230077H06Rik				Akap9		Zfand5	Synj1		Pip5k1c
								Ubtd2			Tmem65	Cyth2				Ptpn12		Tjp2	Qk		Nfic
								Guk1			Ddx17	Grin2d				Fam126a		Pten	Pdpk1		R3hdm2
								Shisa6			Usp16	Zdhhc13				1500035N22Rik		Hectd2	Ndufv3		Spred2
								Smyd4			Abca3	Tubgcp5				Kmt2c		Btaf1	Prrt1		Cyfip2
								Gjc1			Cul2	Mef2a				Dpysl5		March5	Tmem151b		Sqstm1
								Arl4a			Ap3s1	Unc45a				Agbl5		Ide	Hsp90ab1		Vamp2
								Lrfn5			Tbc1d12	Picalm				Uvssa		Tm9sf3	Aqp4		Abr
								Frmd6			Actr1a	Syt9				Jakmip1		Scd2	Rprd1a		Ppp1r9b
								Pcnx			Trim8	Rps15a				Crmp1			Reep5		Srcin1
								Ubr7			Shoc2	Mapk3				Stk32b			Pura		Fbxl20
								Ccdc85c			Eif3a	Inpp5f				Nsg1			Igip		Ppp1r1b
								Eml1			Usp9x	Deaf1				Adgra3			Zmat2		Atp6v0a1
								Ptprn2			Ddx3x	Tspan4				N4bp2			Sptbn2		Dusp3
								B3galnt2			Cask	Cttn				Apbb2			Rtn3		Gaa
								Inhba				Cers4				Slain2			Cpeb3		Nptx1
								A330102I10Rik				Ankrd10				Kit			Atp6ap2		Baiap2
								Atxn1				Arhgef7				C530008M17Rik			Dcaf12l1		Dnmt3a
								Rbm24				Cdc16				Adamts3			Nlgn3		Immp2l
								Mef2c				Gtf2e2				Mthfd2l			Zcchc18		Cox16
								Rasgrf2				Mfhas1				Tmem150c					Traf3
								Jmy				Ncan				Zfp326					Apopt1
								Plk2				Kcnn1				Pcgf3					Tmem196
								Snx18				Map1s				Ttc28					Ryr2
								Arl15				Dda1				Mn1					D130043K22Rik
								Prkaa1				Mvb12a				Miat					Nrn1
								Zhx1				Fam32a				Msi1					Sncb
								Zfat				Otud4				Srrm4					Unc5a
								Atxn10				Usp38				Dtx1					Nkiras1
								Klhl22				Mri1				Kdm2b					Cpne6
								Camk2n2				Rtbdn				Mlxip					Mir124a-1hg
								2510009E07Rik				Adgrg1				Cct6a					Gfra2
								Bcl6				Gfod2				Auts2					Rims2
								Mb21d2				St3gal2				Rfc2					Kcnk9
								Nectin3				Cotl1				Vps37d					Plec
								Cadm2				Zdhhc7				Lrwd1					Grina
								Tiam1				Afg3l1				Plod3					Txn2
								Arid1b				Galnt2				Slc12a9					Cacng2
								Igf2r				Irf2bp2				Nyap1					Pdxp
								Mdga1				Itgb1				Fam20c					1700088E04Rik
								Ppp1r10				Prdm10				Slc29a4					Kcnj4
								Rrp36				Cdon				Tnrc18					Cbx6
								Satb1				Stt3a				Actb					Syngr1
								St6gal2				Bcl9l				Fscn1					Ddn
								Mtcl1				Pafah1b2				Zfp316					Kcnh3
								Sncaip				Fam219b				Cyth3					Zfp385a
								Ldlrad4				Cd276				Usp12					Zdhhc8
								Rnf165				Zfp280d				Dync1i1					Tango2
								Vegfb				Elovl5				St7					Atp5o
								Hnrnpul2				Nphp3				Kcp					Pcp4
								Dtx4				Rhoa				Plxna4					B230307C23Rik
								Atrnl1				Usp19				Ezh2					Flywch1
								Fgd1				Qrich1				Mpp6					Atp6v0c
												Wdr48				Hnrnpa2b1					Pgp
												Rev3l				Cbx3					Fam173a
												Mcu				Mturn					Pacsin1
												Anapc16				Neurod6					Cmtr1
												Ppa1				Rpia					Ppt2
												Sirt1				Reep1					A930015D03Rik
												Wdr18				Mat2a					Ttbk1
												Midn				Tmsb10					Plcl2
												Efna2				Ctnna2					Sema6b
												Sgta				Exoc6b					Impact
												Gna11				Emx1					Pcdh1
												Hsp90b1				Pcyox1					Synpo
												Vezt				Podxl2					Ppargc1b
												Slc6a15				Plxna1					Napg
												Dyrk2				Txnrd3					St8sia5
												Lemd3				Frmd4b					Flrt1
												Tsfm				Chl1					Cox8a
												Os9				Mtmr14					Naa40
												Ptges3				Raf1					Polr2g
												Rhbdd3				Wnt5b					Gda
												Emid1				Phc1					Golga7b
												Ykt6				P3h3					Ftx
												Ccm2				Atf7ip
												Nsg2				Ptpro
												Canx				Trim28
												Cdkn2aipnl				Zc3h4
												G3bp1				Ccdc61
												Usp22				Gipr
												Ncor1				Arhgef1
												Elp5				Pafah1b3
												Arrb2				Tmem145
												Crk				Plekhg2
												Ywhae				Ryr1
												Phf12				Catsperg1
												Wsb1				Dpf1
												Kpnb1				Tbcb
												Rpl23				Arhgap33
												Thra				Gramd1a
												Aarsd1				Wtip
												Lsm12				2410002F23Rik
												H3f3b				Lrrc4b
												Srp68				Prmt1
												Actg1				Prr12
												Hgs				Nav2
												Rfng				Gm9801
												Fasn				Chrna7
												Rab10				St8sia2
												Smc6				Det1
												Ddx1				Crtc3
												Sypl				Gab2
												3110039M20Rik				Fchsd2
												Strn3				Dchs1
												Nemf				Eif4g2
												D430019H16Rik				Pde3b
												Ccnk				Mettl9
												Mta1				Sbk1
												Esyt2				Ppp4c
												Rala				Tubgcp2
												Nup153				Camsap3
												Nol8				Prr36
												Rnf44				Erlin2
												Nsd1				Mak16
												Grk6				Pcm1
												Hnrnpa0				Casp3
												Lpcat1				Gmip
												Clptm1l				Myo9b
												E430024I08Rik				Ano8
												Bdp1				Pgls
												Hmgcs1				Colgalt1
												Top2b				Pkn1
												Ero1l				Rfx1
												Rab2b				Cc2d1a
												Mettl3				Nanos3
												Pspc1				Zswim4
												Pabpc1				Nfix
												Peg13				Mast1
												Ly6h				4931428F04Rik
												Top1mt				Zfp821
												Eef1d				Vac14
												Hsf1				Znrf1
												Sept3				Cmip
												Poldip3				Zcchc14
												Gramd4				Mvd
												Tubgcp6				Spire2
												Ppp6r2				Tubb3
												Tuba1a				Gas8
												Asic1				Trim67
												Cbx5				Fam76b
												Comt				Taf1d
												Psmd2				Olfm2
												Eif4g1				Ilf3
												Tra2b				Elavl3
												Atp13a3				Clmp
												Gap43				Ncam1
												Cd200				Alg9
												Urb1				Ppp2r1b
												Cacna1h				Hcn4
												Stub1				Neo1
												Notch3				Igdcc4
												Zfp871				Igdcc3
												2310061I04Rik				Usp3
												Abcf1				Rab8b
												Prr3				Tmod3
												Kat2b				Hcrtr2
												Nrxn1				Senp6
												Mapre2				Syncrip
												Iws1				Pcbp4
												Map3k2				Celsr3
												Pcdhgc4				Ccdc51
												Pggt1b				Smarcc1
												Csnk1g3				Sgk1
												Csnk1a1				Ptprk
												Gnal				Soga3
												Tcf4				Hdac2
												Kdm2a				Marcks
												Pacs1				E130307A14Rik
												Banf1				Sobp
												Ehbp1l1				Cd24a
												Tm7sf2				Sgpl1
												Sf1				H2afy2
												Rasgrp2				Jmjd1c
												Nrxn2				Bcr
												Nxf1				Prmt2
												Fads2				Plppr3
												Fads1				Apc2
												Ddb1				Mob3a
												Tmem109				Atcay
												Smc5				Tle2
												Uhrf2				Txnrd1
												Pprc1				Aldh1l2
												Add3				Syn3
												Araf				Tmpo
												Sh3kbp1				Poc1b
																Csrp2
																Grip1
																Cdk4
																Smarcc2
																Peli1
																Bcl11a
																5730522E02Rik
																Sh3pxd2b
																Ranbp17
																Adam19
																Hnrnph1
																Hnrnpab
																Mapk7
																Kdm6b
																Efnb3
																Eif4a1
																Mnt
																Myo1c
																Zfp207
																Brip1os
																Cacna1g
																Samd14
																Pcgf2
																Neurod2
																Jup
																Mapt
																Cacng4
																Slc39a11
																Mfsd11
																Mgat5b
																Tbc1d16
																Slc38a10
																Aspscr1
																Klhl29
																Pum2
																Pdia6
																Odc1
																Asap2
																Sox11
																Myt1l
																Pxdn
																Lamb1
																Prkar2b
																Bzw2
																Foxg1
																Daam1
																Syne2
																Npc2
																Sptlc2
																Foxn3
																Rps6ka5
																Itpk1
																Btbd7
																Evl
																Akt1
																Sp4
																Pitrm1
																Tdp2
																Gm40841
																2610307P16Rik
																Sox4
																Tubb2b
																Rnf182
																Phf2
																Fgd3
																Hnrnpk
																Dapk1
																Ube2ql1
																Rhobtb3
																Mblac2
																C130071C03Rik
																Gm17750
																Rasa1
																Ssbp2
																Enc1
																Nln
																Zswim6
																Plpp1
																Gprin2
																Sh2d4b
																Peli2
																Zfhx2os
																Jph4
																Amer2
																Fdft1
																Msra
																Dpysl2
																Ccar2
																Xpo7
																Tsc22d1
																Diaph3
																Slain1
																Ipo5
																Farp1
																Ank
																Trio
																Sybu
																Rad21
																Mtss1
																Fam49b
																Sla
																Ndrg1
																Scrib
																Rbfox2
																Triobp
																Micall1
																Fam227a
																Tcf20
																Scube1
																Mpped1
																5031439G07Rik
																Lncppara
																Plxnb2
																Nell2
																Slc38a1
																Slc38a2
																Ddx23
																4930578M01Rik
																Atf7
																Hnrnpa1
																Srl
																Glis2
																Rbfox1
																Dvl3
																Masp1
																Lpp
																Tmem44
																Zbtb20
																Cblb
																Robo2
																Bach1
																Cryzl1
																Itsn1
																Hmgn1
																Tulp4
																Acat2
																Zbtb9
																Vars
																Tubb5
																Dhx16
																Atat1
																Zfp57
																Supt3
																Tmem63b
																Cul7
																Usp49
																Kcnh8
																Shd
																Ptprs
																Fbxl17
																Ppp4r1
																Arhgap28
																Spast
																Epc1
																Fhod3
																AW554918
																Nrep
																Psd2
																Nrg2
																Dpysl3
																Ccdc112
																Lmnb1
																Fbn2
																Nedd4l
																Zfp532
																Ctif
																Smad2
																Setbp1
																Pard6g
																Pqlc1
																Ighmbp2
																Gm960
																Pcnx3
																2700081O15Rik
																Mta2
																Gnaq
																Trpm3
																Sema4g
																Ablim1
																Shtn1
																Grk5
																Gm14634
																Dock11
																Hs6st2
																L1cam
																Plxna3
																Tbl1x
																Eda
																Wnk3
